# Supplementary material
Source: Springer Nature journal article supplement (https://www.springermedizin.de/resource/supplementary/12885_2011_3270_MOESM1_ESM.pdf/9463072)

Figure S1

cDNA-AFLP Profiling of Muscle Cachexia

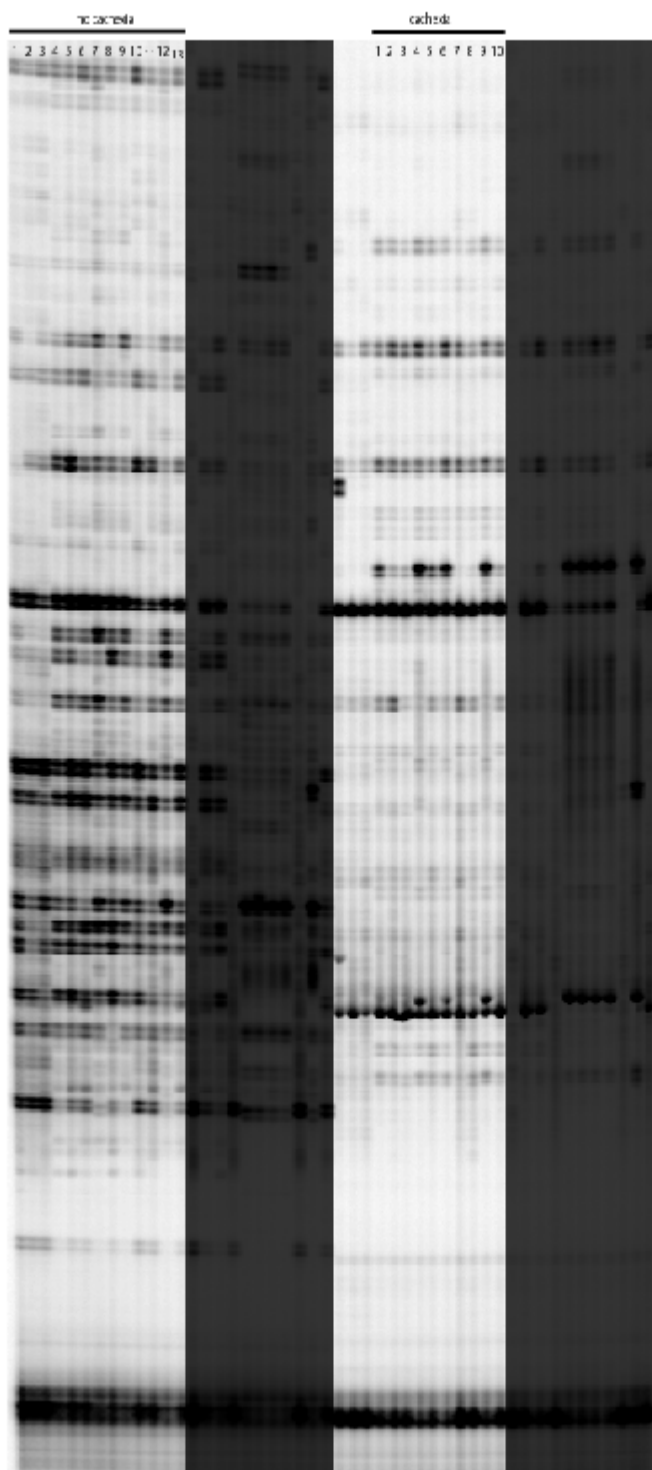

Supplement: MOESM1 [file 9463072]
